# Supplementary material for: High-cholesterol diet does not alter gut microbiota composition in mice
Source: Springer Nature journal article supplement (doi:10.1186/s12986-017-0170-x), 2017-02-16
Supplement: MOESM1 [file 25660614]

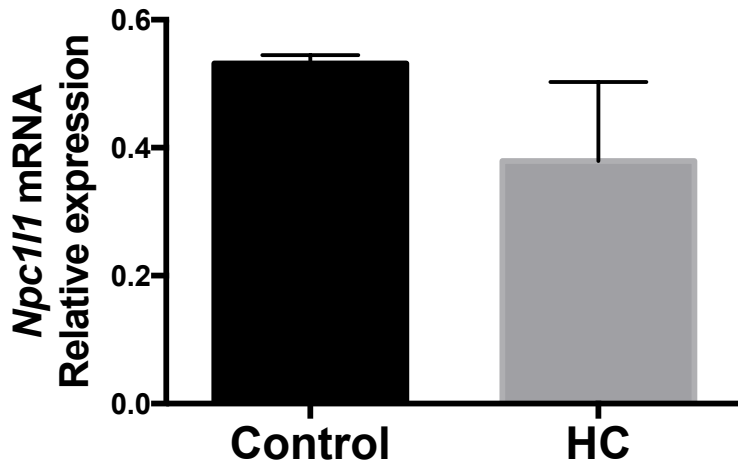

**Additional file 1: Figure S1:** Relative expression of *Npc1l1* mRNA in small intestine of mice after 12 weeks of control or 1.25% cholesterol diet (HC). Data is mean  $\pm$  SEM. Statistical significance was tested with Mann-Whitney U-test.
